# Supplementary material for: Ecological Adaptation and Succession of Human Fecal Microbial Communities in an Automated In Vitro Fermentation System
Source: PubMed Central journal article supplement (PMC8409738; doi:10.1128/msystems.00232-21), 2021-07-27

A

Microbiome composition difference  
between matched samples for the two units,  
shown separately for the three compartments  
(Jensen-Shannon distance)

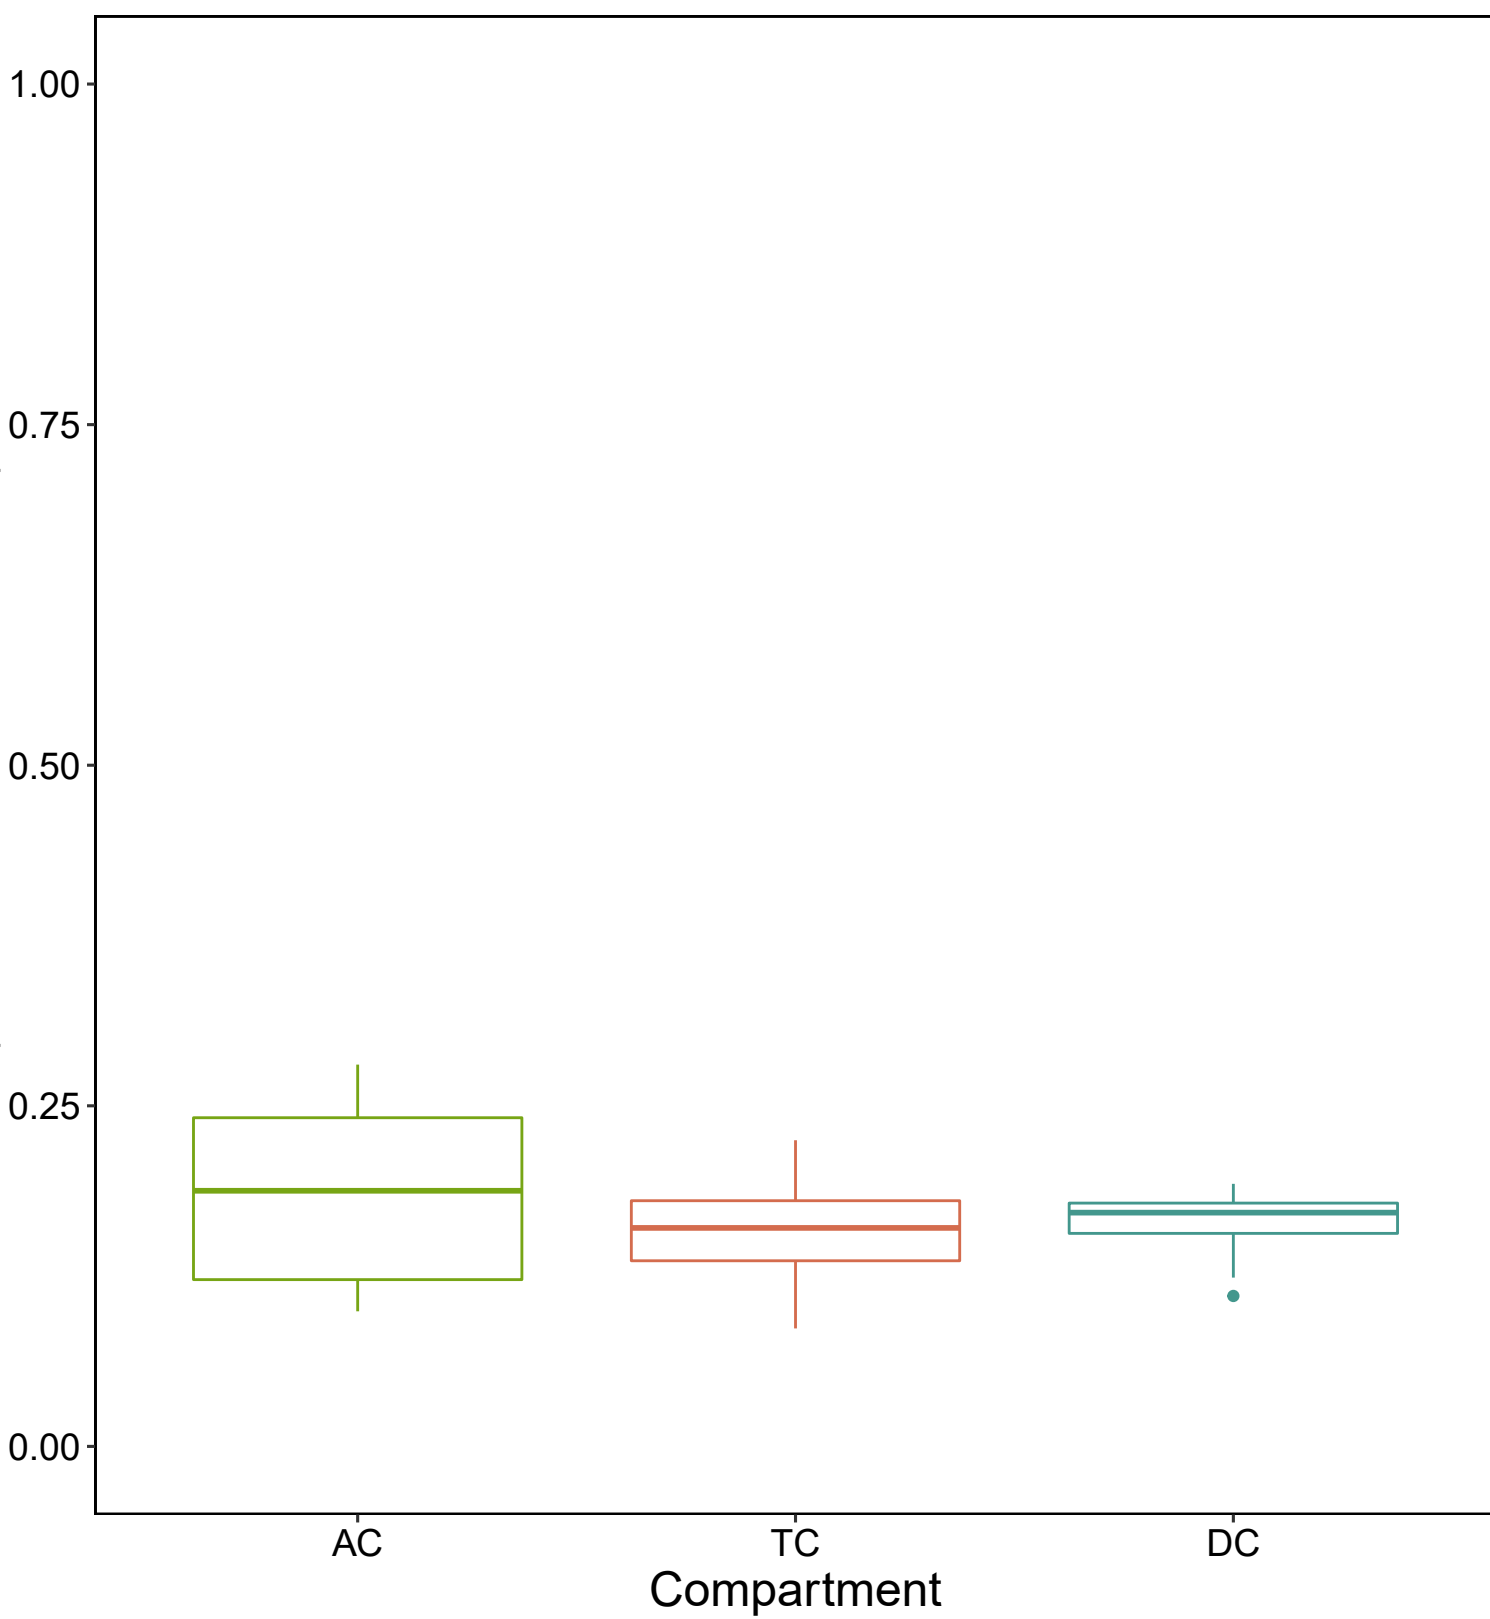

**B**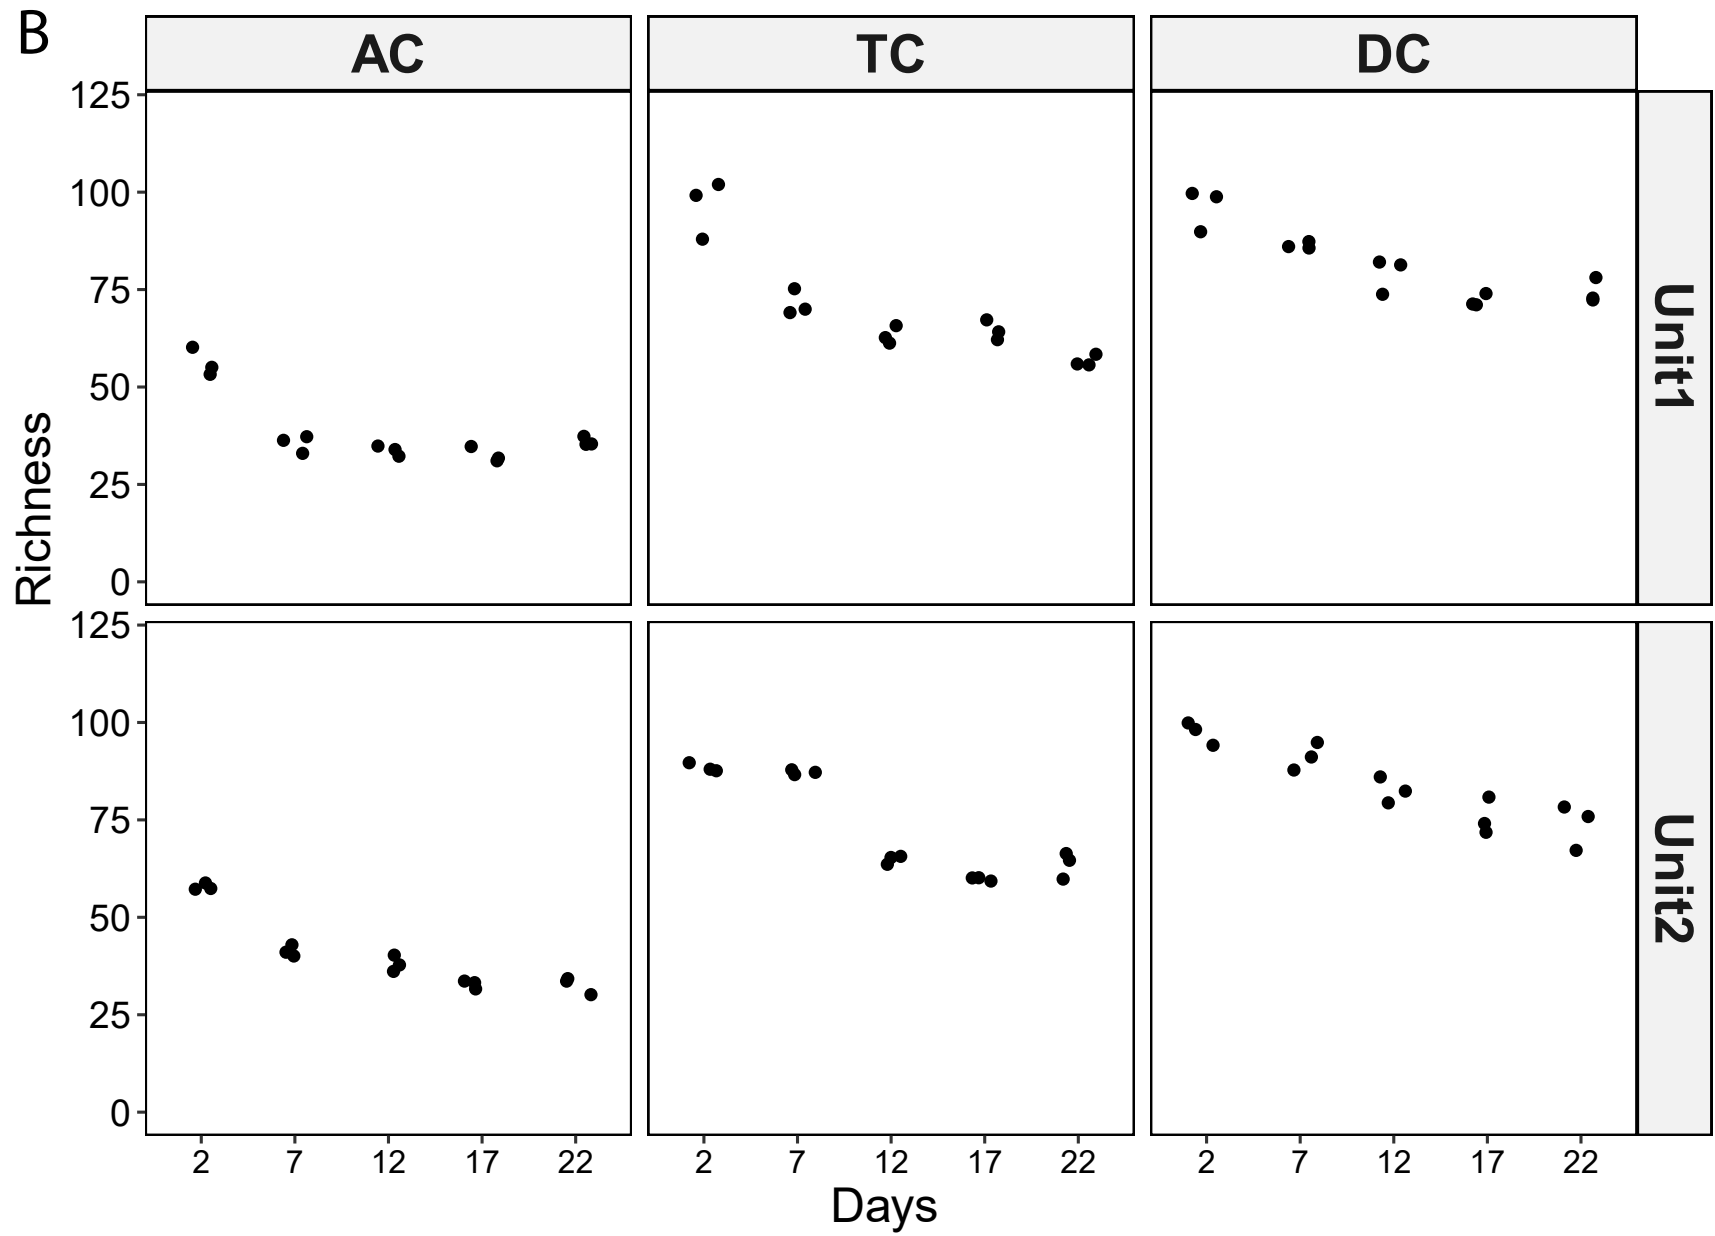

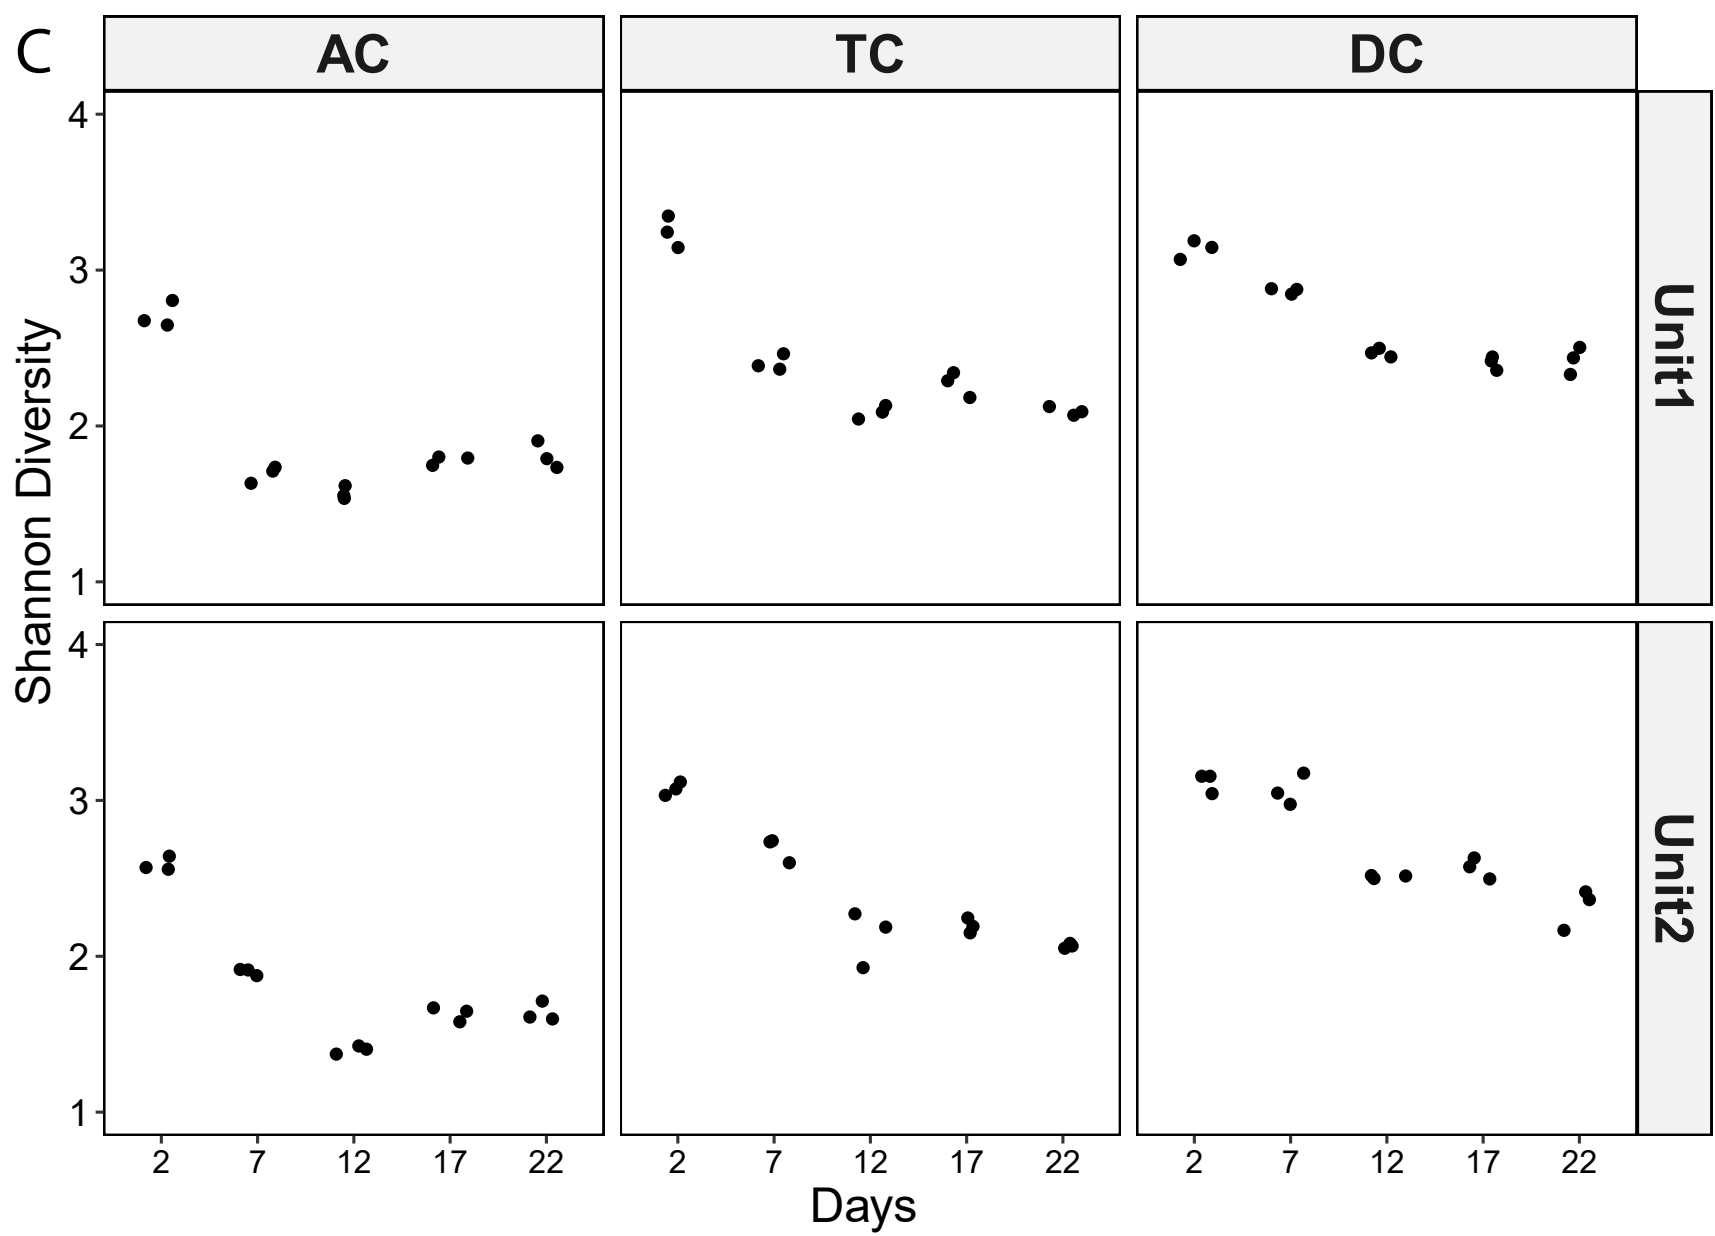

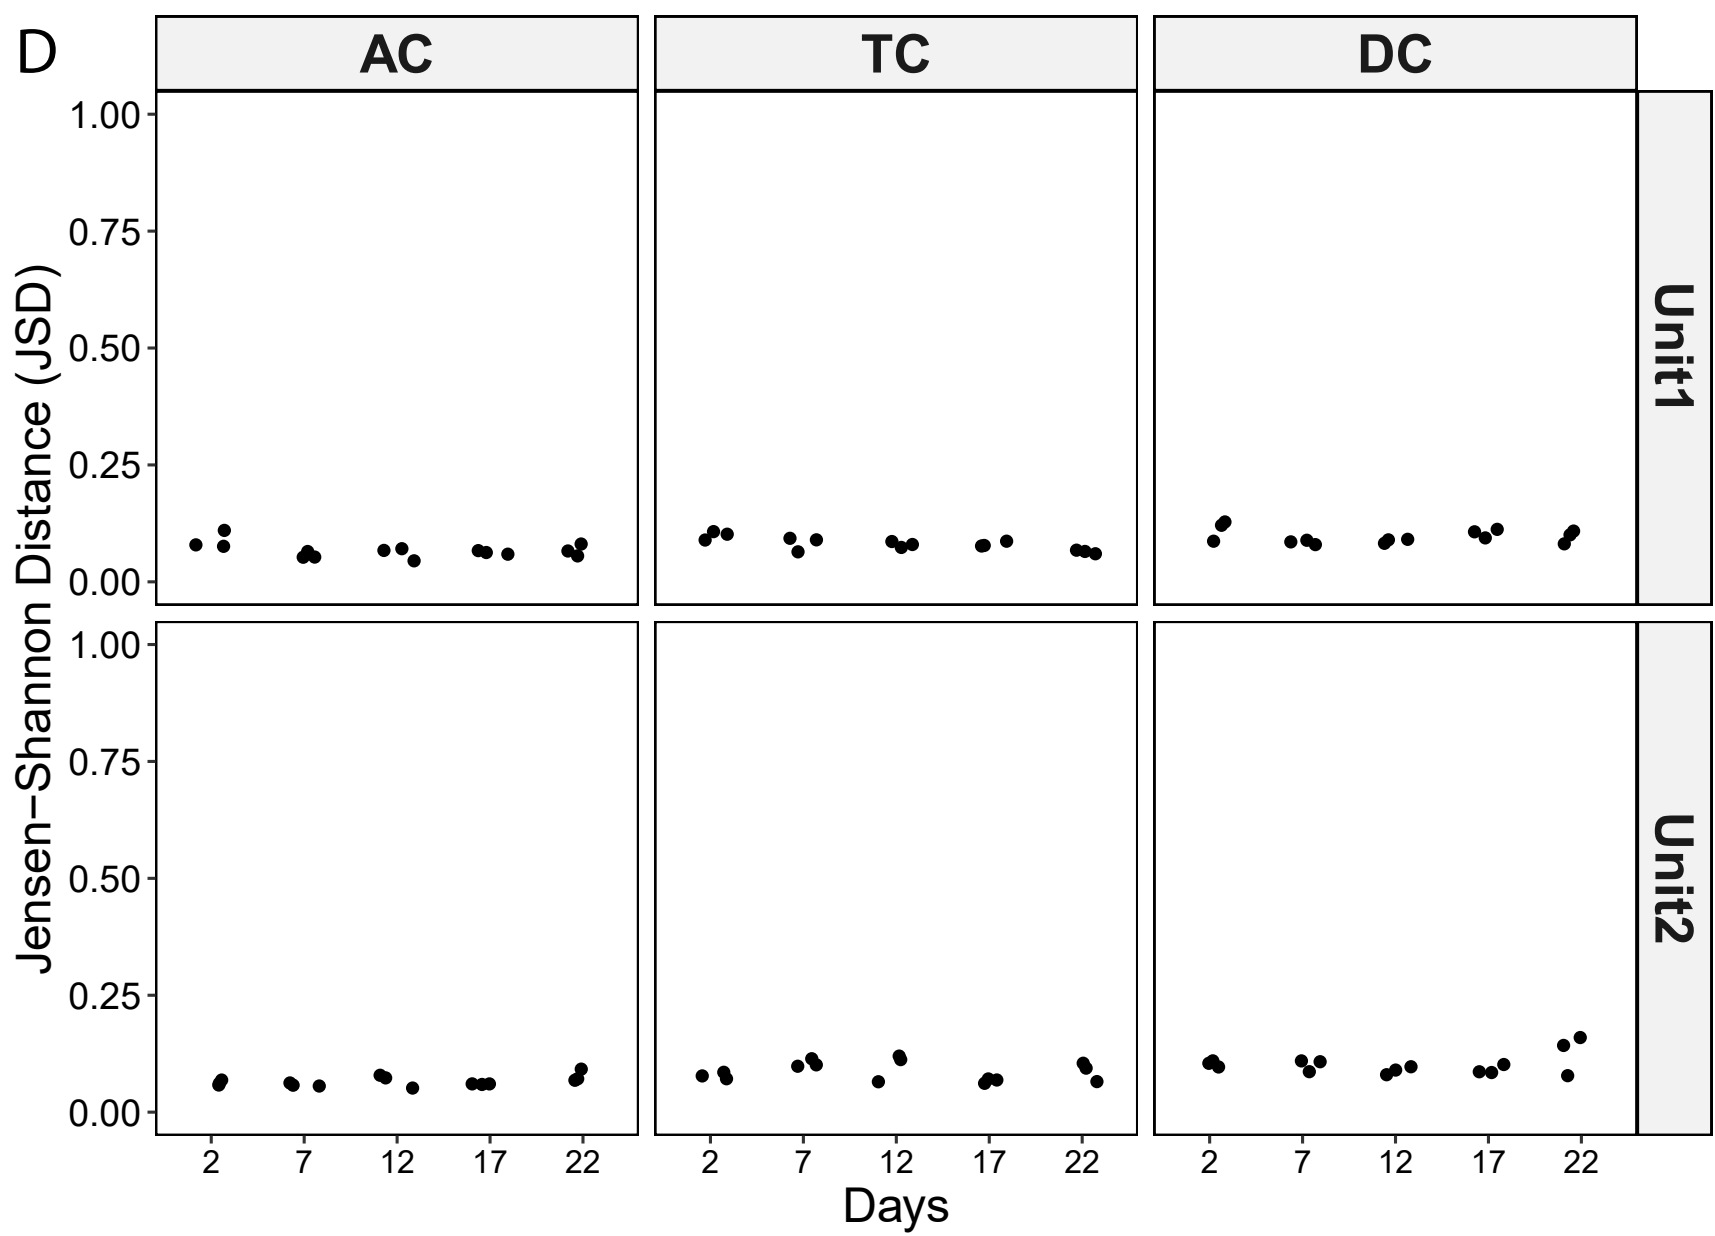

Supplement: msystems.00232-21-sf003.pdf [file msystems.00232-21-sf003.pdf]
