# Supplementary material for: Ecological Adaptation and Succession of Human Fecal Microbial Communities in an Automated In Vitro Fermentation System
Source: PubMed Central journal article supplement (PMC8409738; doi:10.1128/msystems.00232-21), 2021-07-27

A

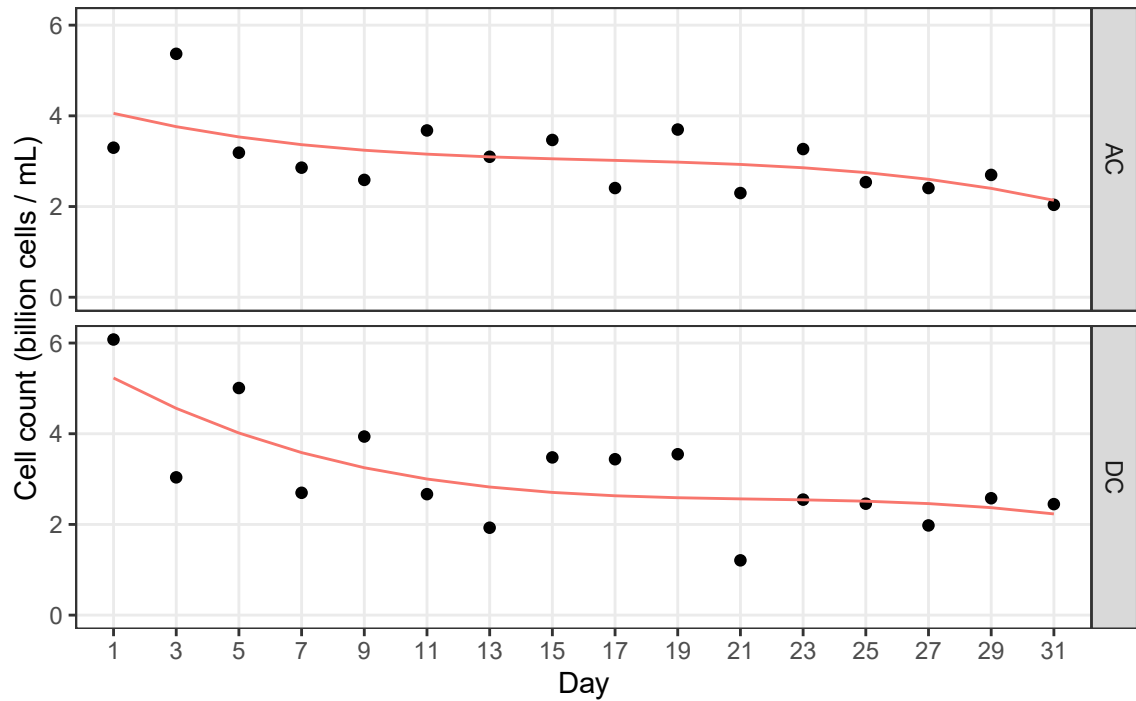

B

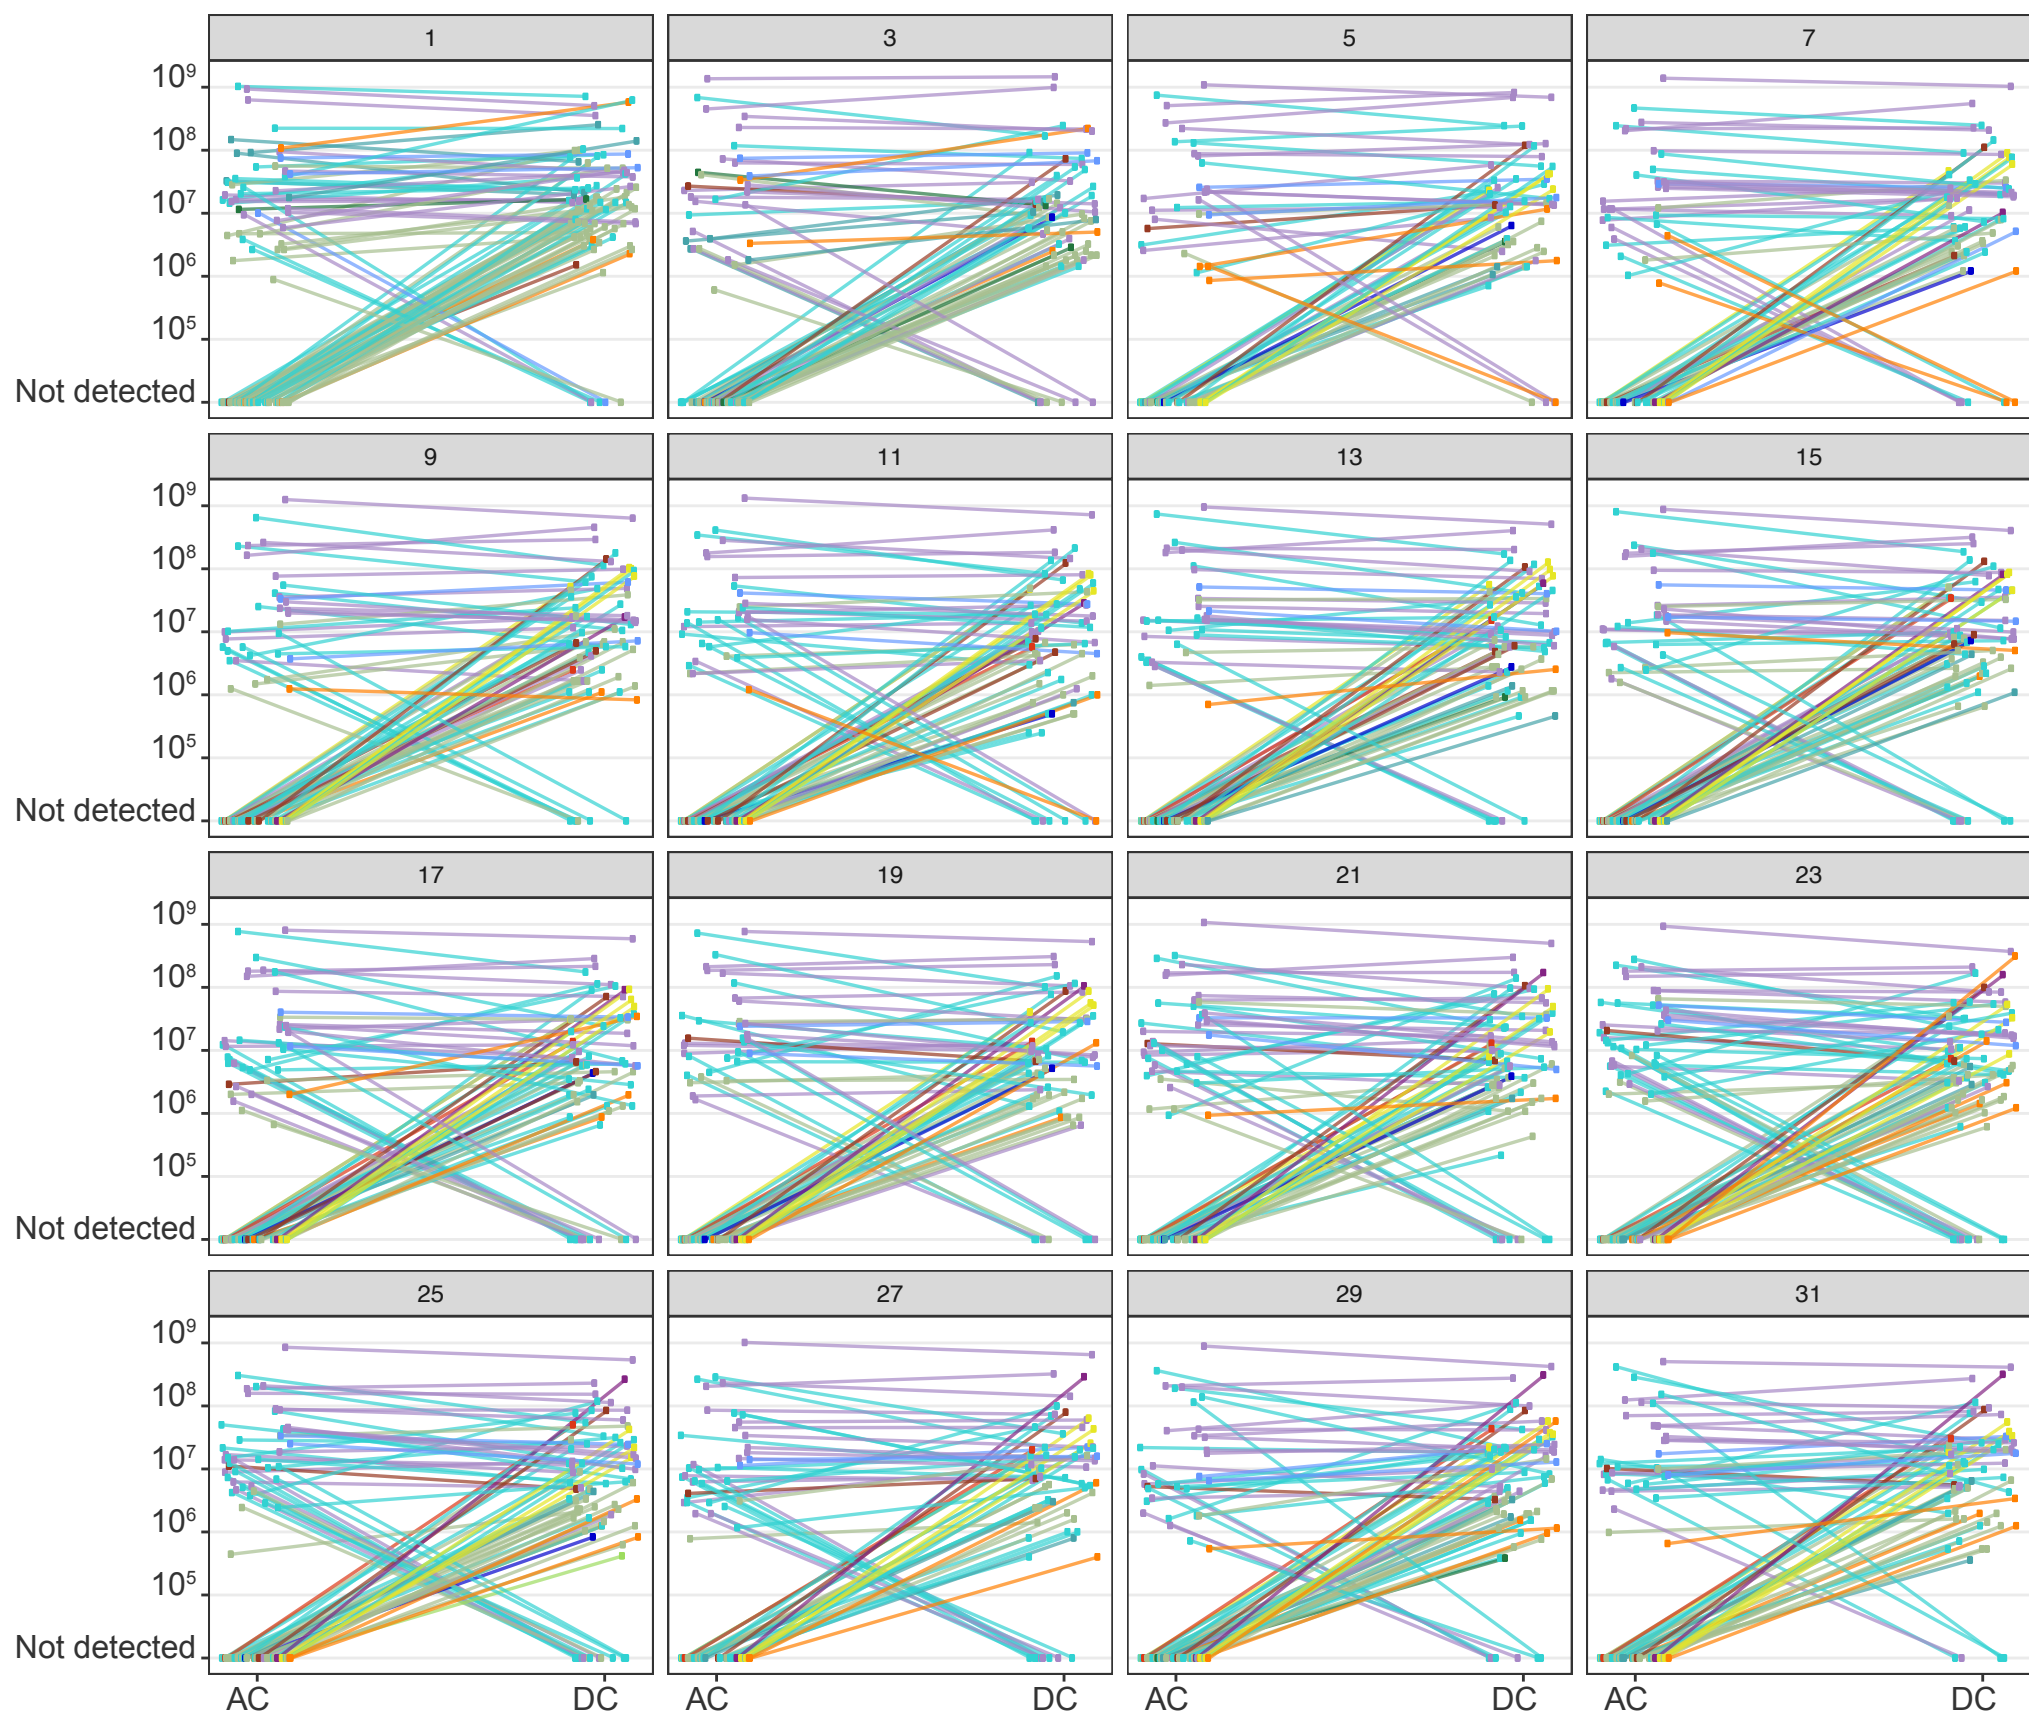

C

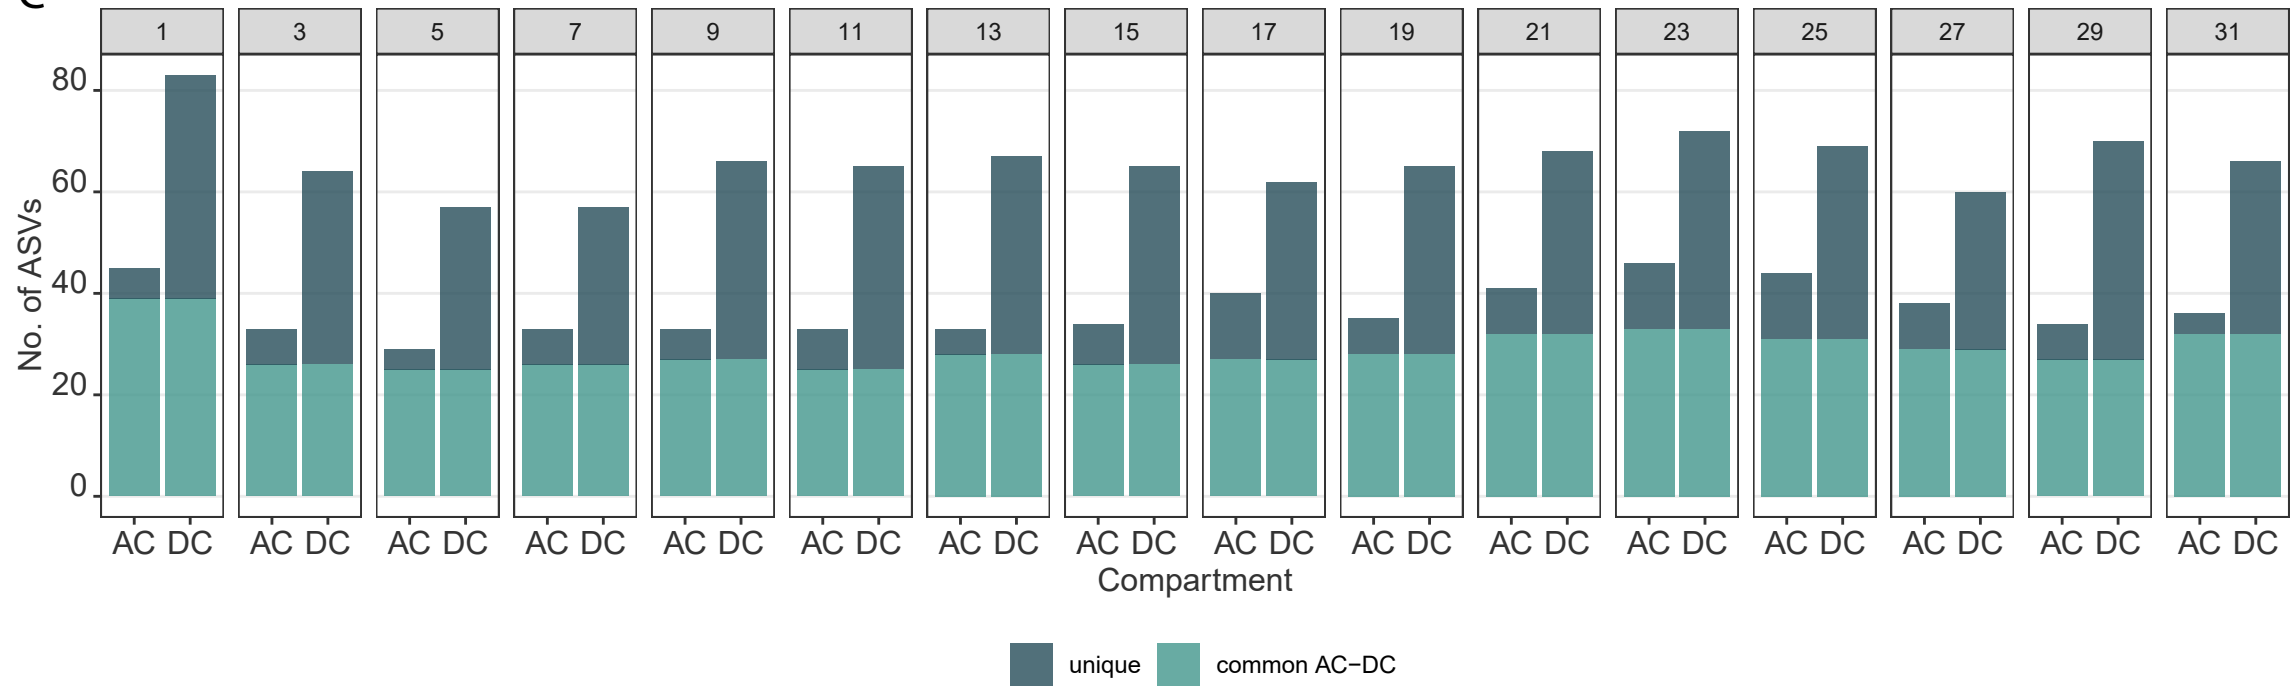

D

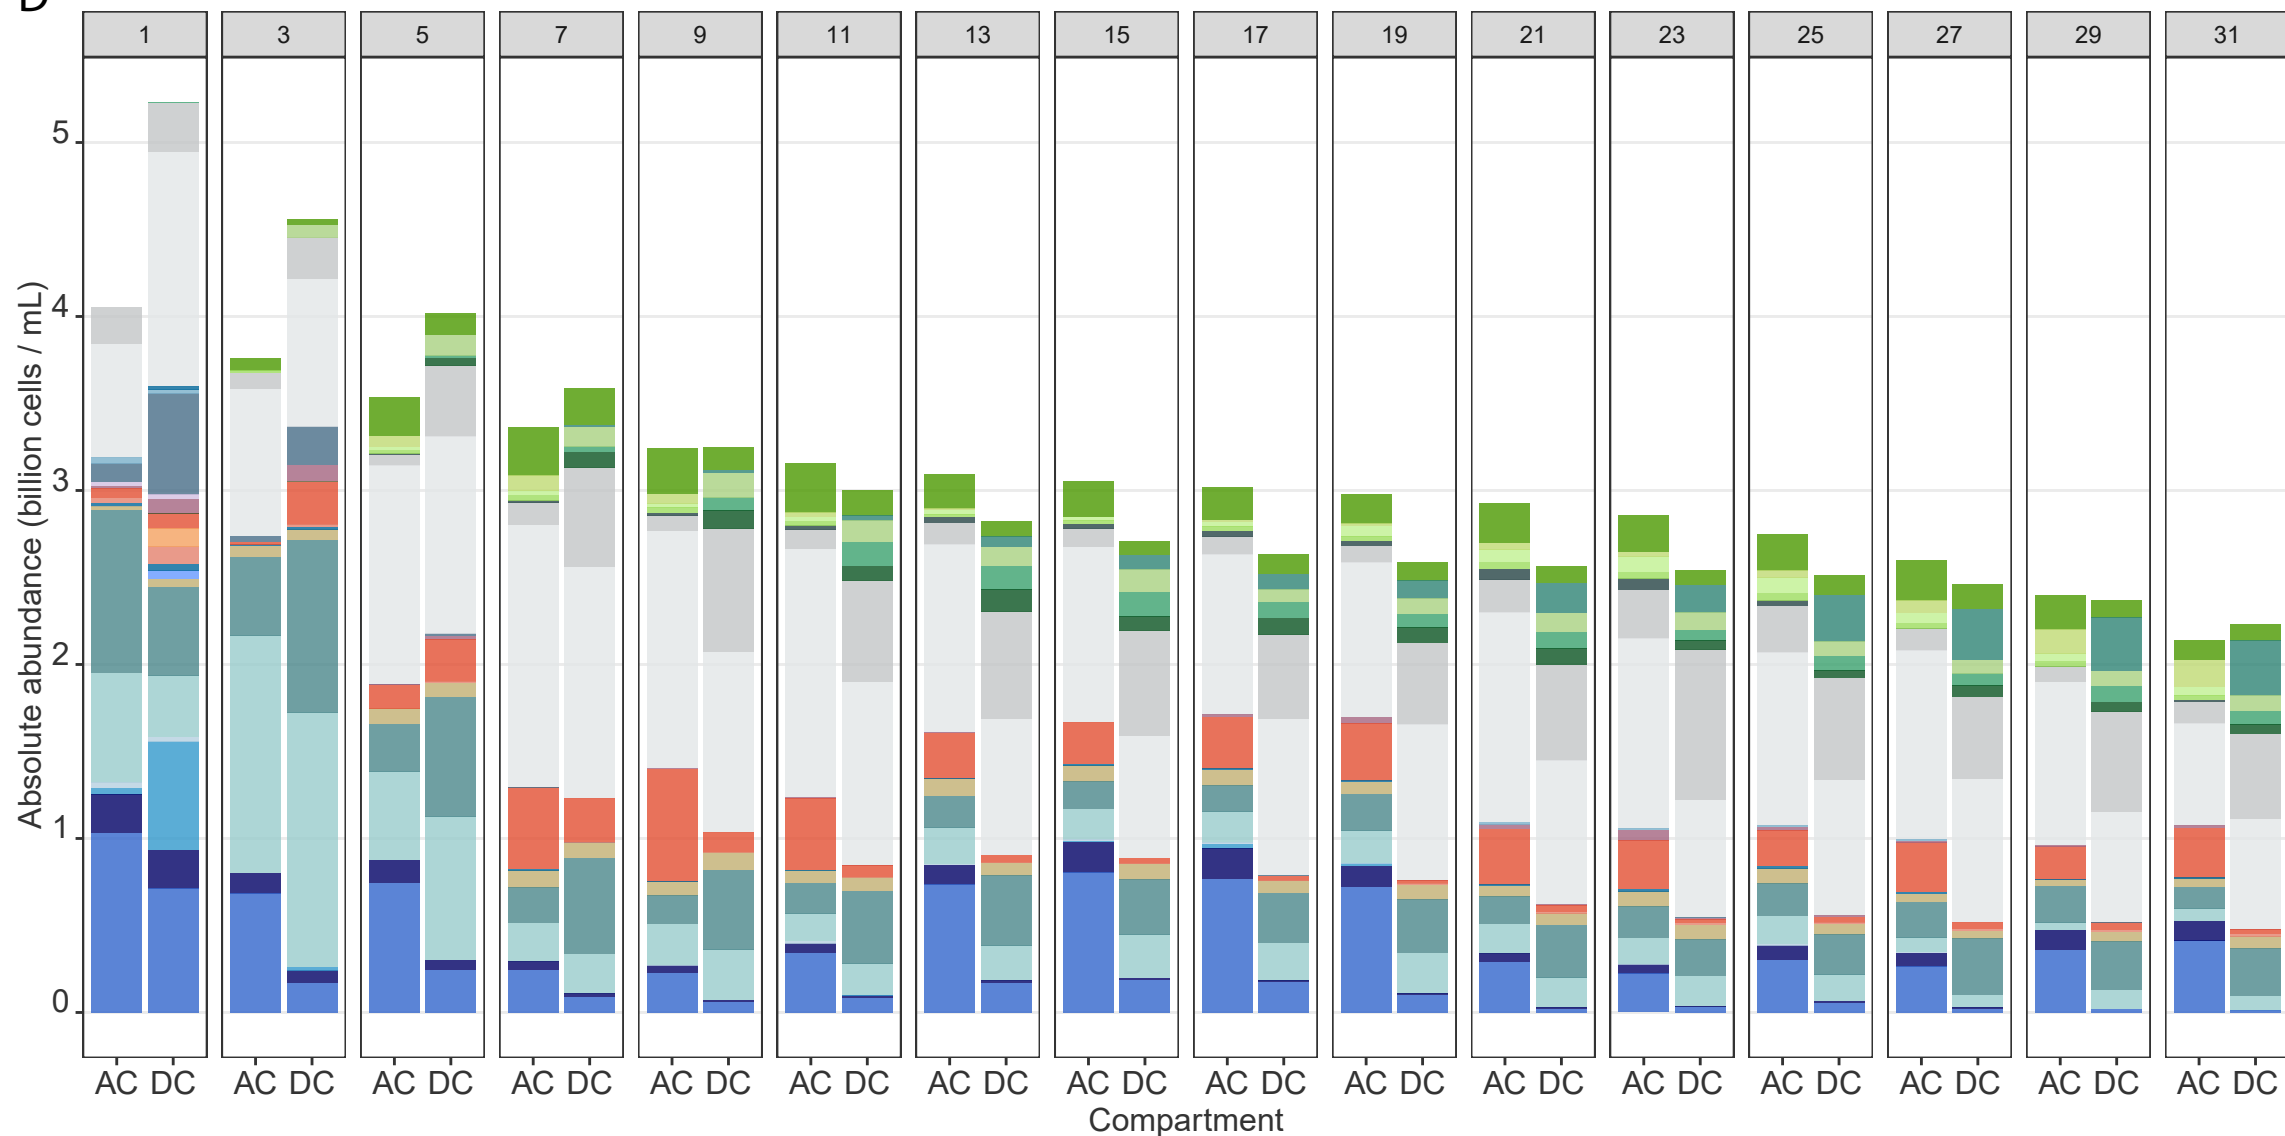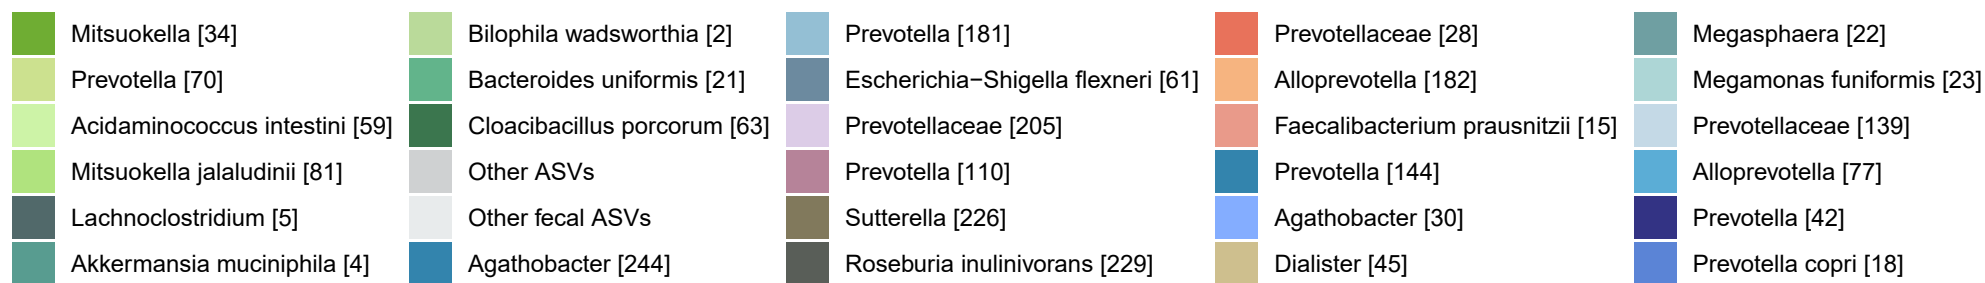

Supplement: msystems.00232-21-sf005.pdf [file msystems.00232-21-sf005.pdf]
