# Supplementary material for: Ecological Adaptation and Succession of Human Fecal Microbial Communities in an Automated In Vitro Fermentation System
Source: PubMed Central journal article supplement (PMC8409738; doi:10.1128/msystems.00232-21), 2021-07-27
Supplement: msystems.00232-21-sf006.pdf [file msystems.00232-21-sf006.pdf]

Log<sub>10</sub>(x)/max(log<sub>10</sub>(x))  
 0 20 40 60 80 100 %

Survivors Non Survivors Bloomers Others

A

DC1 DC2

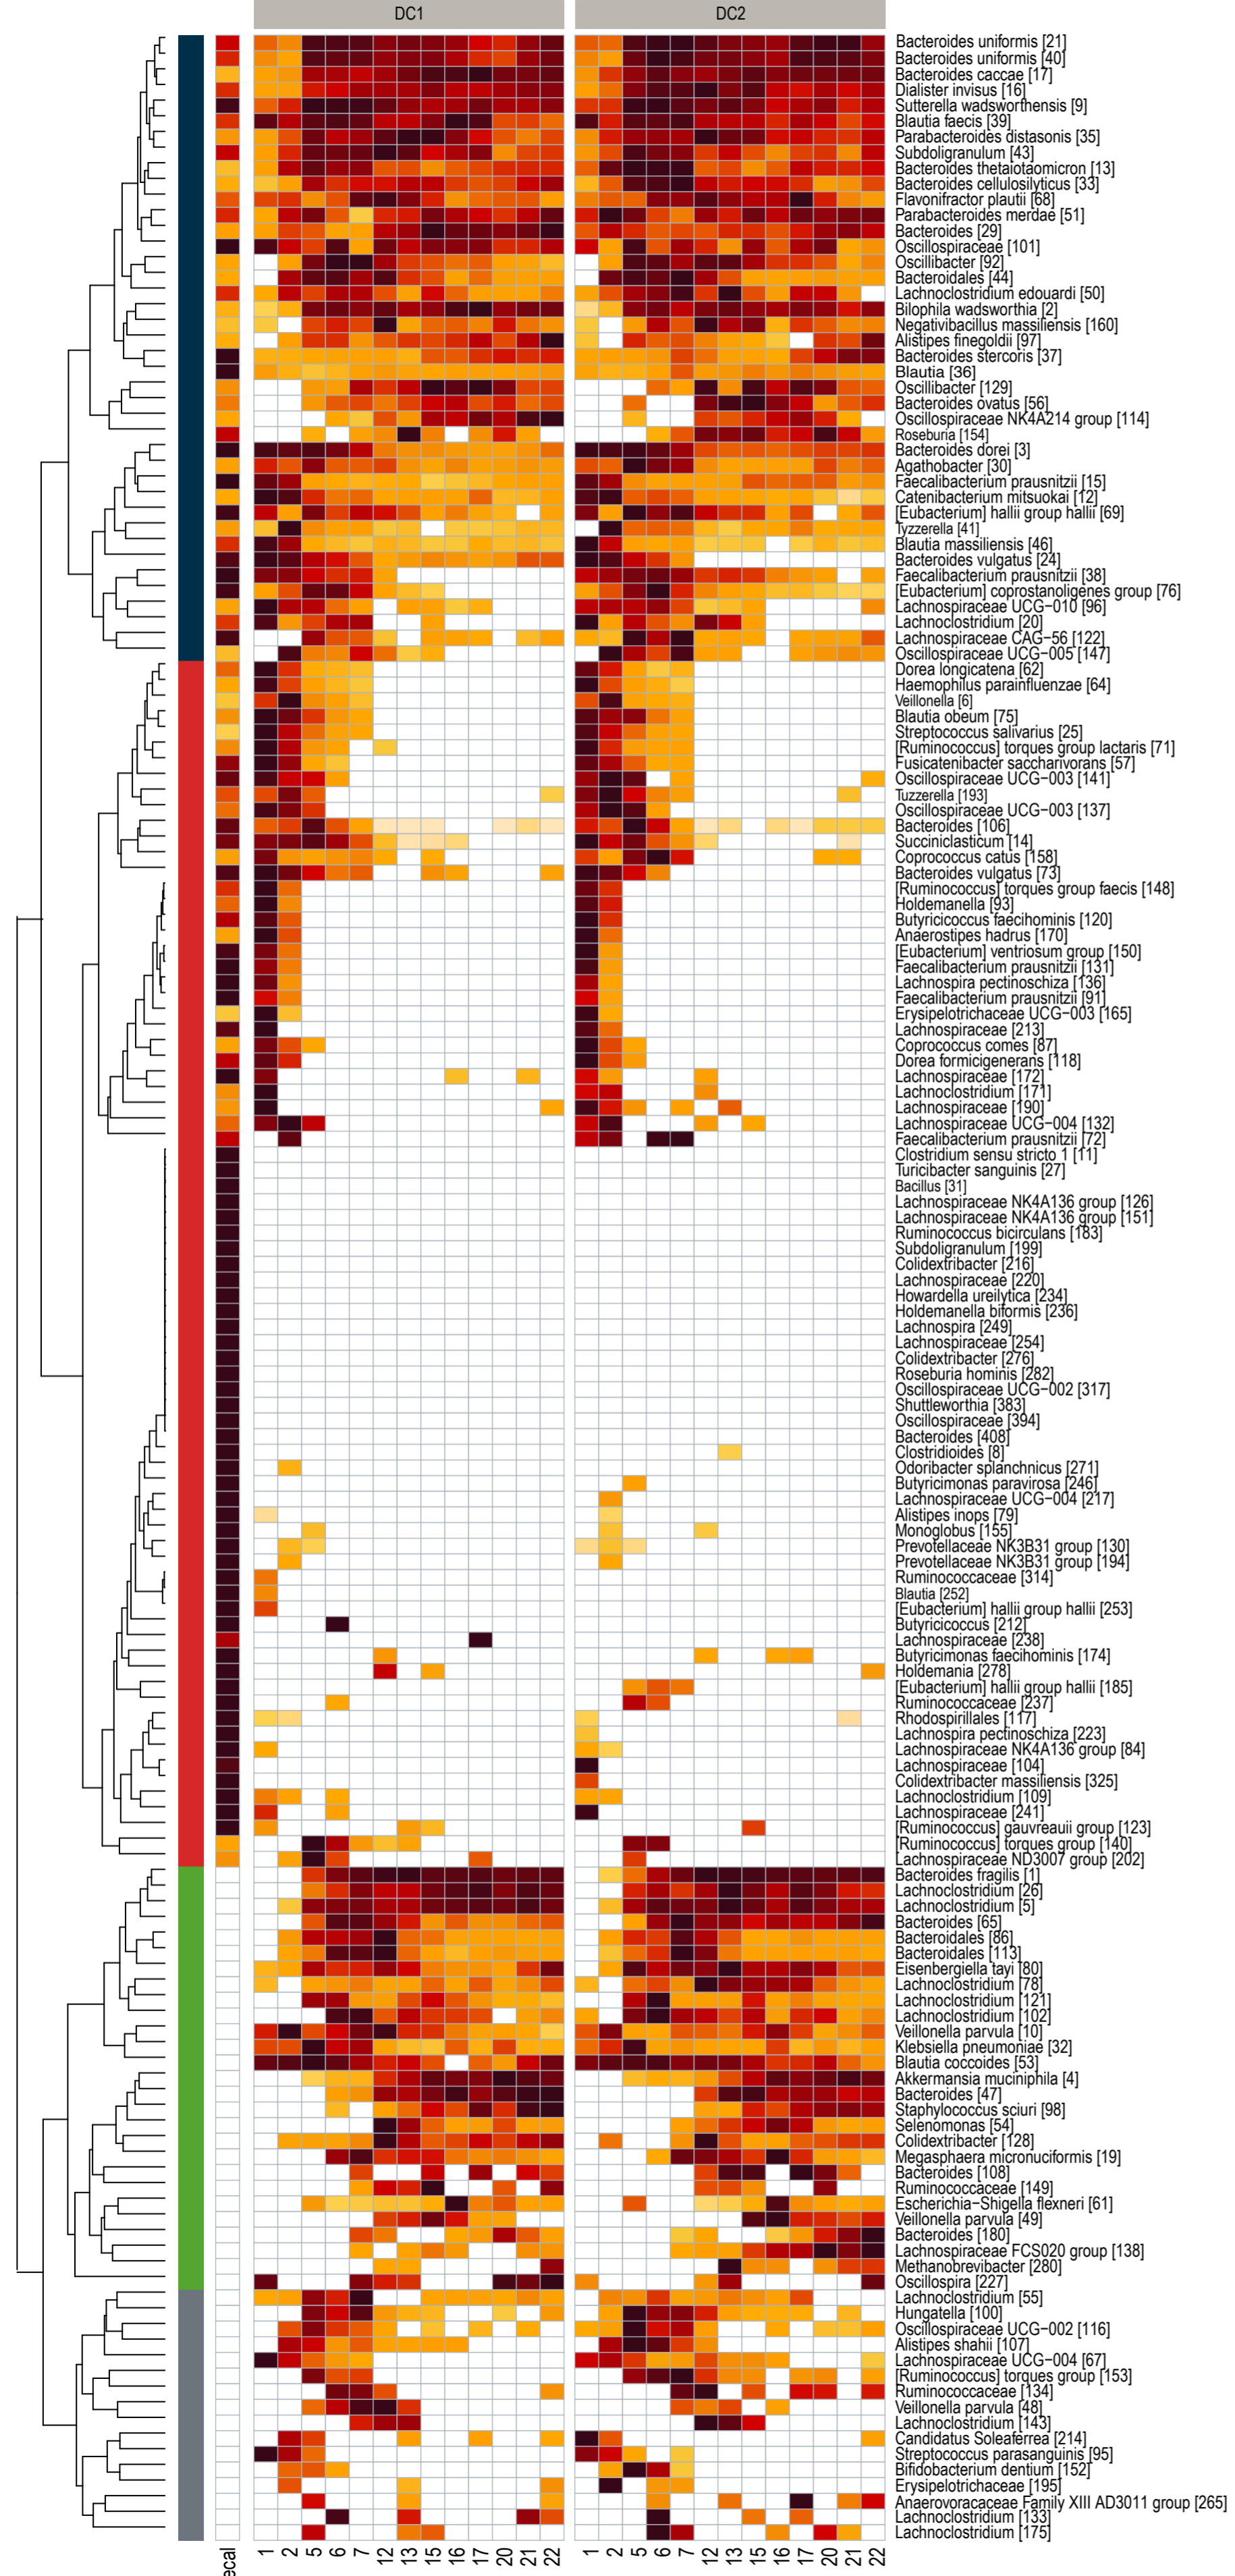

B

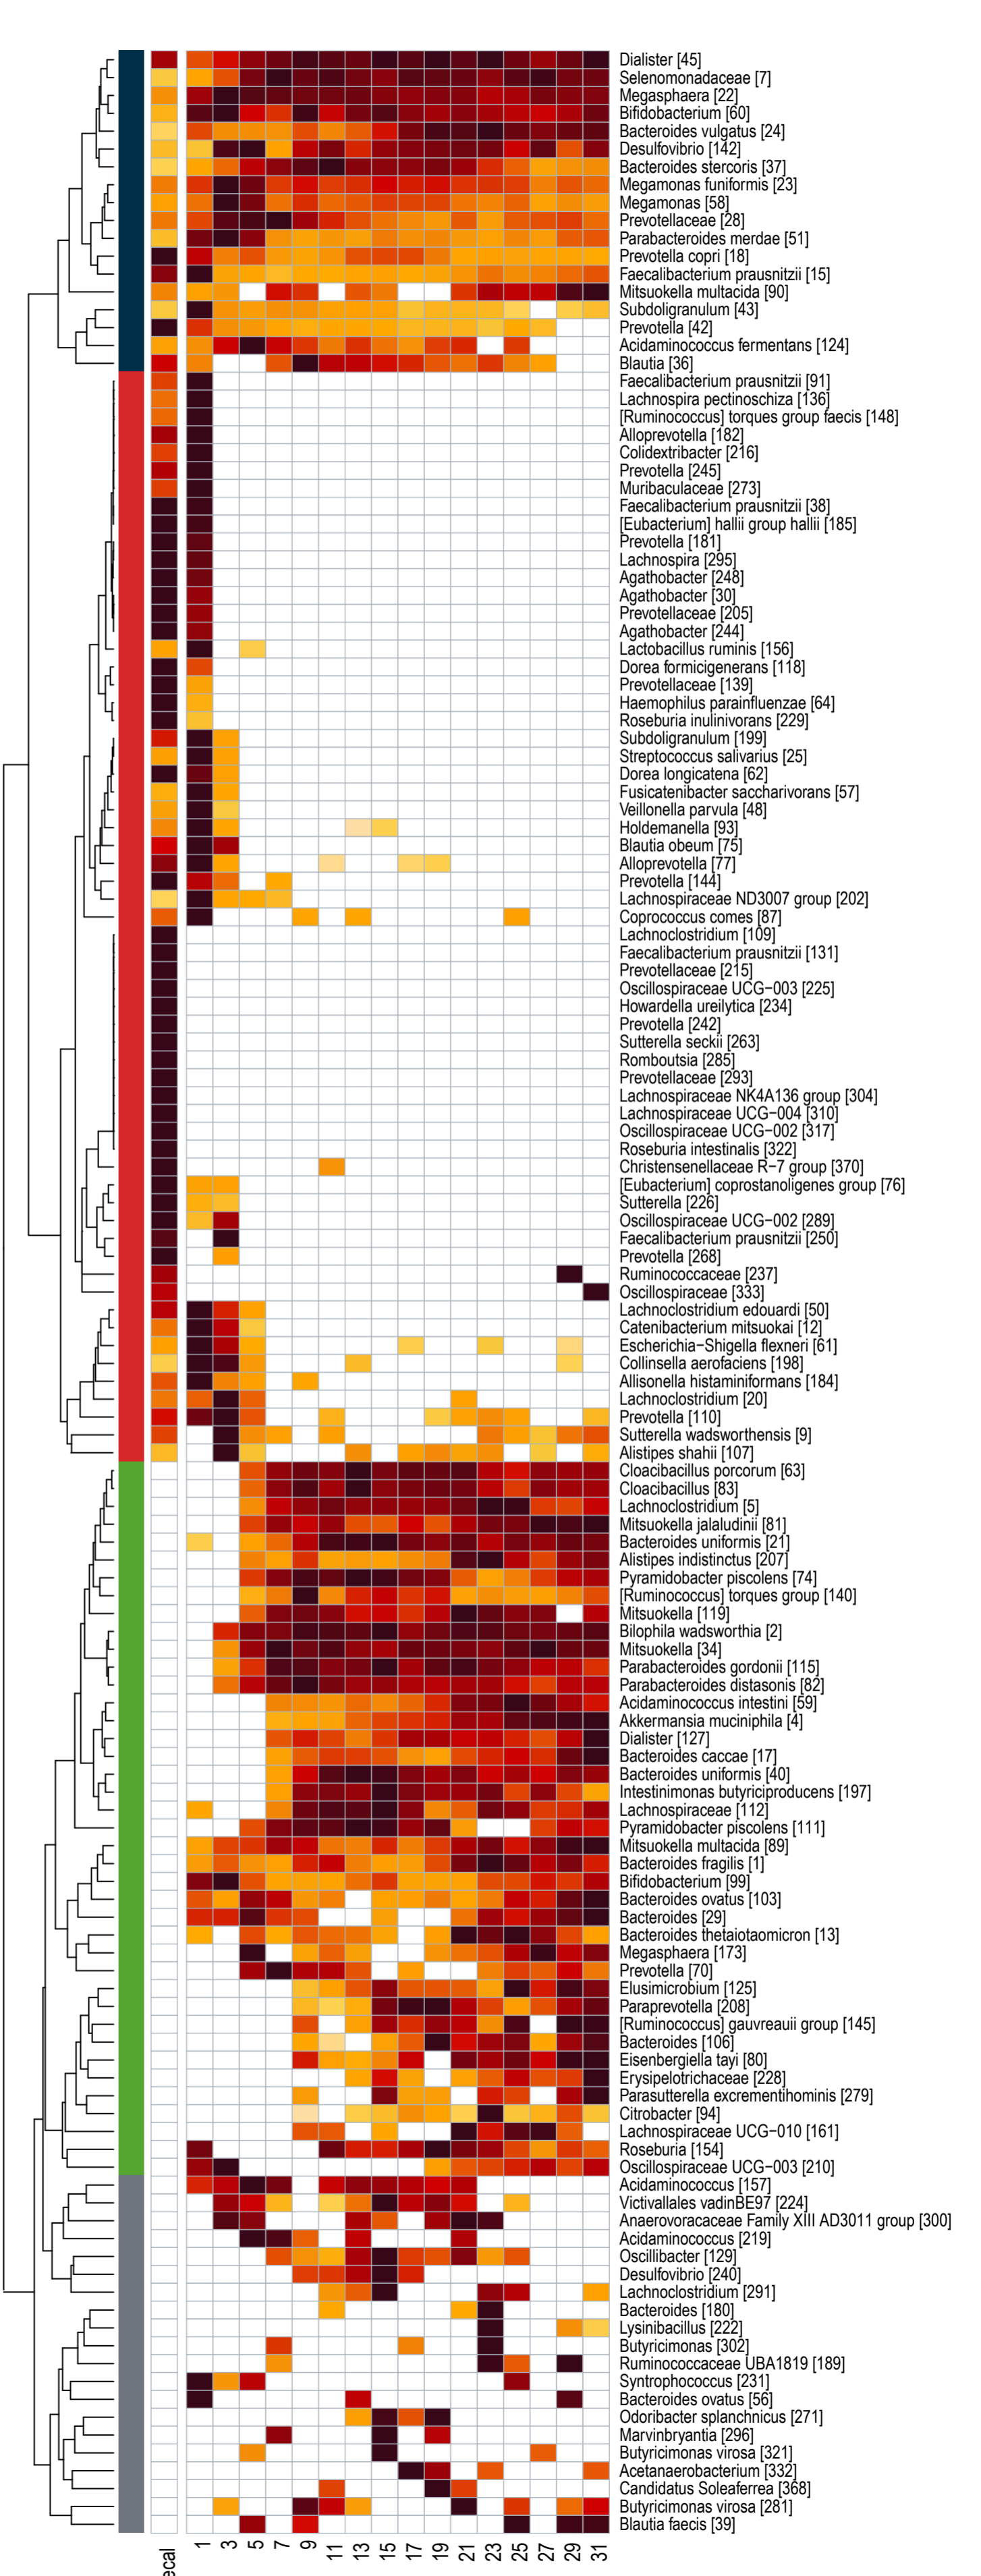

Fecal

Fecal

1 2 3 5 6 7 12 13 15 16 17 20 21 22

1 3 5 7 9 11 13 15 17 19 21 23 25 27 29 31

Bacteroides uniformis [21]  
 Bacteroides uniformis [40]  
 Bacteroides caccae [17]  
 Dialister invisus [16]  
 Sutterella wadsworthensis [9]  
 Blautia faecis [39]  
 Parabacteroides distasonis [35]  
 Subdoligranulum [43]  
 Bacteroides thetaiotaomicron [13]  
 Bacteroides cellulosilyticus [33]  
 Flavonifractor plautii [68]  
 Parabacteroides merdae [51]  
 Bacteroides [29]  
 Oscillospiraceae [101]  
 Oscillibacter [92]  
 Bacteroidales [44]  
 Lachnospiraceae [50]  
 Bilophila wadsworthia [2]  
 Negativibacillus massiliensis [160]  
 Alistipes finegoldii [97]  
 Bacteroides stercoris [37]  
 Blautia [36]  
 Oscillibacter [129]  
 Bacteroides ovatus [56]  
 Oscillospiraceae NK4A214 group [114]  
 Roseburia [154]  
 Bacteroides dorei [3]  
 Agathobacter [30]  
 Faecalibacterium prausnitzii [15]  
 Catenibacterium mitsuokai [12]  
 [Eubacterium] hallii group hallii [69]  
 Tuzzerella [41]  
 Blautia massiliensis [46]  
 Bacteroides vulgatus [24]  
 Faecalibacterium prausnitzii [38]  
 [Eubacterium] coprostanoligenes group [76]  
 Lachnospiraceae UCG-010 [96]  
 Lachnospiraceae [20]  
 Lachnospiraceae CAG-56 [122]  
 Oscillospiraceae UCG-005 [147]  
 Dorea longicatena [62]  
 Haemophilus parainfluenzae [64]  
 Veillonella [6]  
 Blautia obeum [75]  
 Streptococcus salivarius [25]  
 [Ruminococcus] torques group lactaris [71]  
 Fusicatibacter saccharivorans [57]  
 Oscillospiraceae UCG-003 [141]  
 Tuzzerella [193]  
 Oscillospiraceae UCG-003 [137]  
 Bacteroides [106]  
 Succinella [14]  
 Coprococcus catus [158]  
 Bacteroides vulgatus [73]  
 [Ruminococcus] torques group faecis [148]  
 Holdemania [93]  
 Butyrivibrio faecihominis [120]  
 Anaerostipes hadrus [170]  
 [Eubacterium] ventriosum group [150]  
 Faecalibacterium prausnitzii [131]  
 Lachnospira pectinoschiza [136]  
 Faecalibacterium prausnitzii [91]  
 Erysipelotrichaceae UCG-003 [165]  
 Lachnospiraceae [213]  
 Coprococcus comes [87]  
 Dorea formicigenerans [118]  
 Lachnospiraceae [172]  
 Lachnospiraceae [171]  
 Lachnospiraceae [190]  
 Lachnospiraceae UCG-004 [132]  
 Faecalibacterium prausnitzii [72]  
 Clostridium sensu stricto 1 [11]  
 Turicibacter sanguinis [27]  
 Bacillus [31]  
 Lachnospiraceae NK4A136 group [126]  
 Lachnospiraceae NK4A136 group [151]  
 Ruminococcus bicirculans [183]  
 Subdoligranulum [199]  
 Colidextribacter [216]  
 Lachnospiraceae [220]  
 Howardella urelytica [234]  
 Holdemania biformis [236]  
 Lachnospira [249]  
 Lachnospiraceae [254]  
 Colidextribacter [276]  
 Roseburia hominis [282]  
 Oscillospiraceae UCG-002 [317]  
 Shuttleworthia [383]  
 Oscillospiraceae [394]  
 Bacteroides [408]  
 Clostridioides [8]  
 Odoribacter splanchnicus [271]  
 Butyrivibrio paravirosa [246]  
 Lachnospiraceae UCG-004 [217]  
 Alistipes inops [79]  
 Monoglobus [155]  
 Prevotellaceae NK3B31 group [130]  
 Prevotellaceae NK3B31 group [194]  
 Ruminococcaceae [314]  
 Blautia [252]  
 [Eubacterium] hallii group hallii [253]  
 Butyrivibrio [212]  
 Lachnospiraceae [238]  
 Butyrivibrio faecihominis [174]  
 Holdemania [278]  
 [Eubacterium] hallii group hallii [185]  
 Ruminococcaceae [237]  
 Rhodospirillales [117]  
 Lachnospira pectinoschiza [223]  
 Lachnospiraceae NK4A136 group [84]  
 Lachnospiraceae [104]  
 Colidextribacter massiliensis [325]  
 Lachnospiraceae [109]  
 Lachnospiraceae [241]  
 [Ruminococcus] gaurvrauii group [123]  
 [Ruminococcus] torques group [140]  
 Lachnospiraceae NK3007 group [202]  
 Bacteroides fragilis [11]  
 Lachnospiraceae [26]  
 Lachnospiraceae [5]  
 Bacteroides [65]  
 Bacteroidales [86]  
 Bacteroidales [113]  
 Eisenbergiella tayi [80]  
 Lachnospiraceae [78]  
 Lachnospiraceae [121]  
 Lachnospiraceae [102]  
 Veillonella parvula [10]  
 Klebsiella pneumoniae [32]  
 Blautia coxoides [53]  
 Akkermansia muciniphila [4]  
 Bacteroides [47]  
 Staphylococcus sciuri [98]  
 Selenomonas [54]  
 Colidextribacter [128]  
 Megaspheera micronuciformis [19]  
 Bacteroides [108]  
 Ruminococcaceae [149]  
 Escherichia-Shigella flexneri [61]  
 Veillonella parvula [49]  
 Bacteroides [180]  
 Lachnospiraceae FCS020 group [138]  
 Methanobrevibacter [280]  
 Oscillibacter [227]  
 Lachnospiraceae [55]  
 Hungateella [100]  
 Oscillospiraceae UCG-002 [116]  
 Alistipes shahii [107]  
 Lachnospiraceae UCG-004 [67]  
 [Ruminococcus] torques group [153]  
 Ruminococcaceae [134]  
 Veillonella parvula [48]  
 Lachnospiraceae [143]  
 Candidatus Soleaferrea [214]  
 Streptococcus parasanguinis [95]  
 Bifidobacterium dentium [152]  
 Erysipelotrichaceae [195]  
 Anaerovoracaceae Family XIII AD3011 group [265]  
 Lachnospiraceae [133]  
 Lachnospiraceae [175]

Dialister [45]  
 Selenomonadaceae [7]  
 Megaspheera [22]  
 Bifidobacterium [60]  
 Bacteroides vulgatus [24]  
 Desulfobivrio [142]  
 Bacteroides stercoris [37]  
 Megamonas funiformis [23]  
 Megamonas [58]  
 Prevotellaceae [28]  
 Parabacteroides merdae [51]  
 Prevotella copri [18]  
 Faecalibacterium prausnitzii [15]  
 Mitsuokella multacidia [90]  
 Subdoligranulum [43]  
 Prevotella [42]  
 Acidaminococcus fermentans [124]  
 Blautia [36]  
 Faecalibacterium prausnitzii [91]  
 Lachnospira pectinoschiza [136]  
 [Ruminococcus] torques group faecis [148]  
 Alloprevotella [182]  
 Colidextribacter [216]  
 Prevotella [245]  
 Muribaculaceae [273]  
 Faecalibacterium prausnitzii [38]  
 [Eubacterium] hallii group hallii [185]  
 Prevotella [181]  
 Lachnospira [295]  
 Agathobacter [248]  
 Agathobacter [30]  
 Prevotellaceae [205]  
 Agathobacter [244]  
 Lactobacillus ruminis [156]  
 Dorea formicigenerans [118]  
 Prevotellaceae [139]  
 Haemophilus parainfluenzae [64]  
 Roseburia inulinivorans [229]  
 Subdoligranulum [199]  
 Streptococcus salivarius [25]  
 Dorea longicatena [62]  
 Fusicatibacter saccharivorans [57]  
 Veillonella parvula [48]  
 Holdemania [93]  
 Blautia obeum [75]  
 Alloprevotella [77]  
 Prevotella [144]  
 Lachnospiraceae ND3007 group [202]  
 Coprococcus comes [87]  
 Lachnospiraceae [109]  
 Faecalibacterium prausnitzii [131]  
 Prevotellaceae [215]  
 Oscillospiraceae UCG-003 [225]  
 Howardella urelytica [234]  
 Prevotella [242]  
 Sutterella seckii [263]  
 Romboutsia [285]  
 Prevotellaceae [293]  
 Lachnospiraceae NK4A136 group [304]  
 Lachnospiraceae UCG-004 [310]  
 Oscillospiraceae UCG-002 [317]  
 Roseburia intestinalis [322]  
 Christensenellaceae R-7 group [370]  
 [Eubacterium] coprostanoligenes group [76]  
 Sutterella [226]  
 Oscillospiraceae UCG-002 [289]  
 Faecalibacterium prausnitzii [250]  
 Prevotella [268]  
 Ruminococcaceae [237]  
 Oscillospiraceae [333]  
 Lachnospiraceae [50]  
 Catenibacterium mitsuokai [12]  
 Escherichia-Shigella flexneri [61]  
 Collinsella aerofaciens [198]  
 Allisonella histaminiformans [184]  
 Lachnospiraceae [20]  
 Prevotella [110]  
 Sutterella wadsworthensis [9]  
 Alistipes shahii [107]  
 Cloacibacillus porcorum [63]  
 Cloacibacillus [83]  
 Lachnospiraceae [5]  
 Mitsuokella jalaludini [81]  
 Bacteroides uniformis [21]  
 Alistipes indistinctus [207]  
 Pyramidobacter piscicola [74]  
 [Ruminococcus] torques group [140]  
 Mitsuokella [119]  
 Bilophila wadsworthia [2]  
 Parabacteroides gordonii [115]  
 Parabacteroides distasonis [82]  
 Acidaminococcus intestinalis [59]  
 Akkermansia muciniphila [4]  
 Dialister [127]  
 Bacteroides caccae [17]  
 Bacteroides uniformis [40]  
 Intestinimonas butyriciproducens [197]  
 Lachnospiraceae [112]  
 Pyramidobacter piscicola [111]  
 Mitsuokella multacidia [89]  
 Bacteroides fragilis [1]  
 Bifidobacterium [99]  
 Bacteroides ovatus [103]  
 Bacteroides [29]  
 Bacteroides thetaiotaomicron [13]  
 Megaspheera [173]  
 Prevotella [70]  
 Elusimicrobium [125]  
 Paraprevotella [208]  
 [Ruminococcus] gaurvrauii group [145]  
 Bacteroides [106]  
 Eisenbergiella tayi [80]  
 Erysipelotrichaceae [228]  
 Parasutterella excrementihominis [279]  
 Citrobacter [94]  
 Lachnospiraceae UCG-010 [161]  
 Roseburia [154]  
 Oscillospiraceae UCG-003 [210]  
 Acidaminococcus [157]  
 Victivallales vadinBE97 [224]  
 Anaerovoracaceae Family XIII AD3011 group [300]  
 Acidaminococcus [219]  
 Oscillibacter [129]  
 Desulfobivrio [240]  
 Lachnospiraceae [291]  
 Bacteroides [180]  
 Lysinibacillus [222]  
 Butyrivibrio [302]  
 Ruminococcaceae UBA1819 [189]  
 Syntrophococcus [231]  
 Bacteroides ovatus [56]  
 Odoribacter splanchnicus [271]  
 Marvinbryantia [296]  
 Butyrivibrio virosa [321]  
 Acetanaerobacterium [332]  
 Candidatus Soleaferrea [368]  
 Butyrivibrio virosa [281]  
 Blautia faecis [39]
