# Supplementary material for: Ecological Adaptation and Succession of Human Fecal Microbial Communities in an Automated In Vitro Fermentation System
Source: PubMed Central journal article supplement (PMC8409738; doi:10.1128/msystems.00232-21), 2021-07-27
Supplement: msystems.00232-21-sf007.pdf [file msystems.00232-21-sf007.pdf]

A

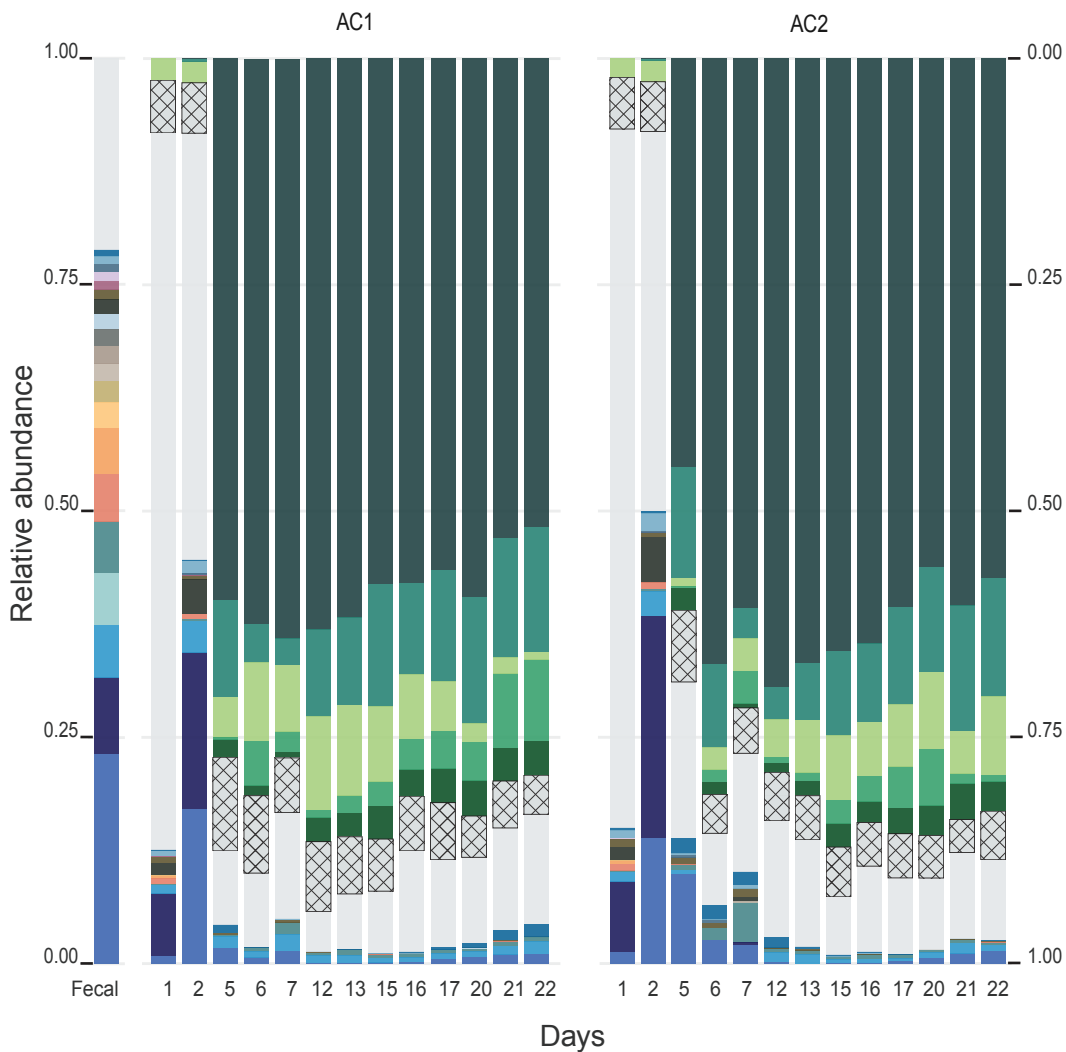

B

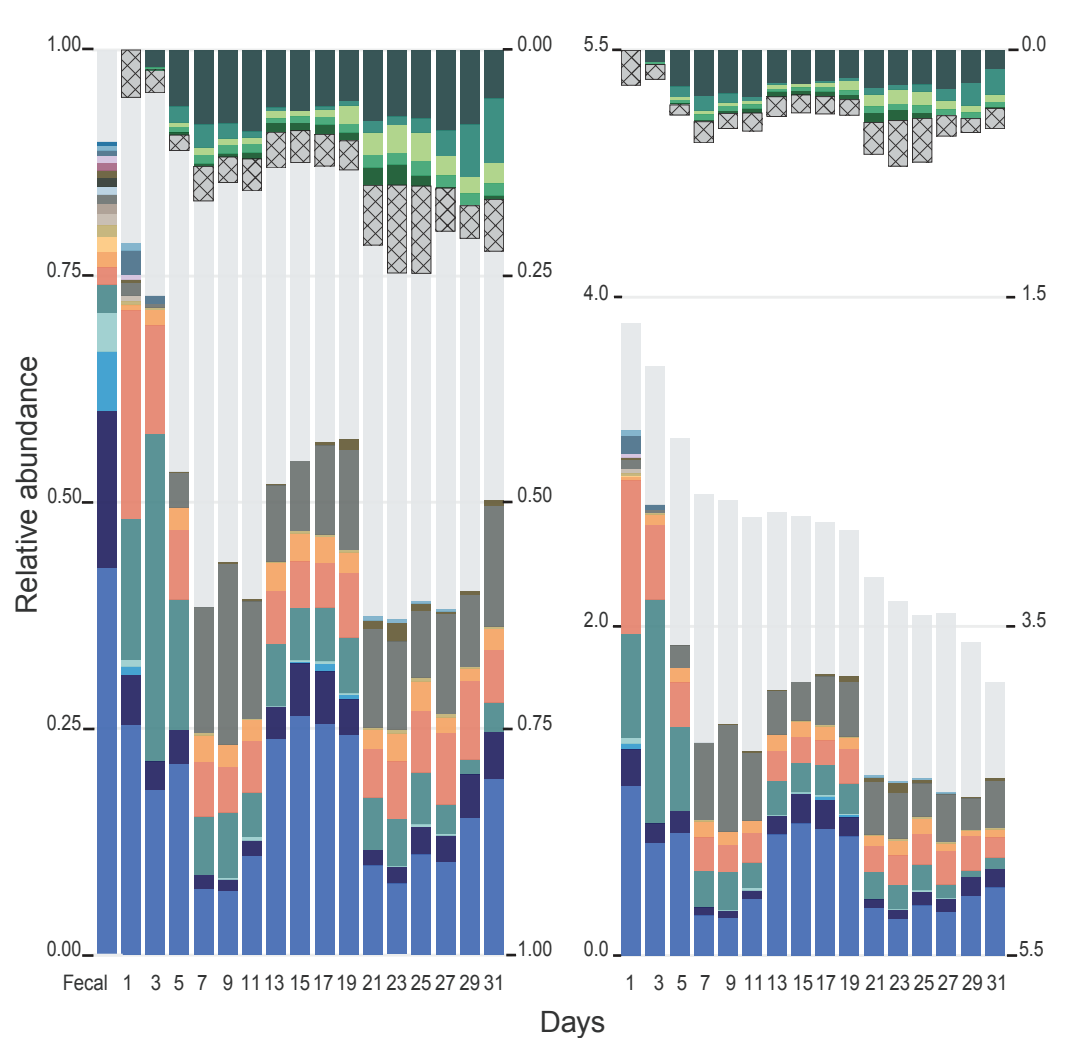

C

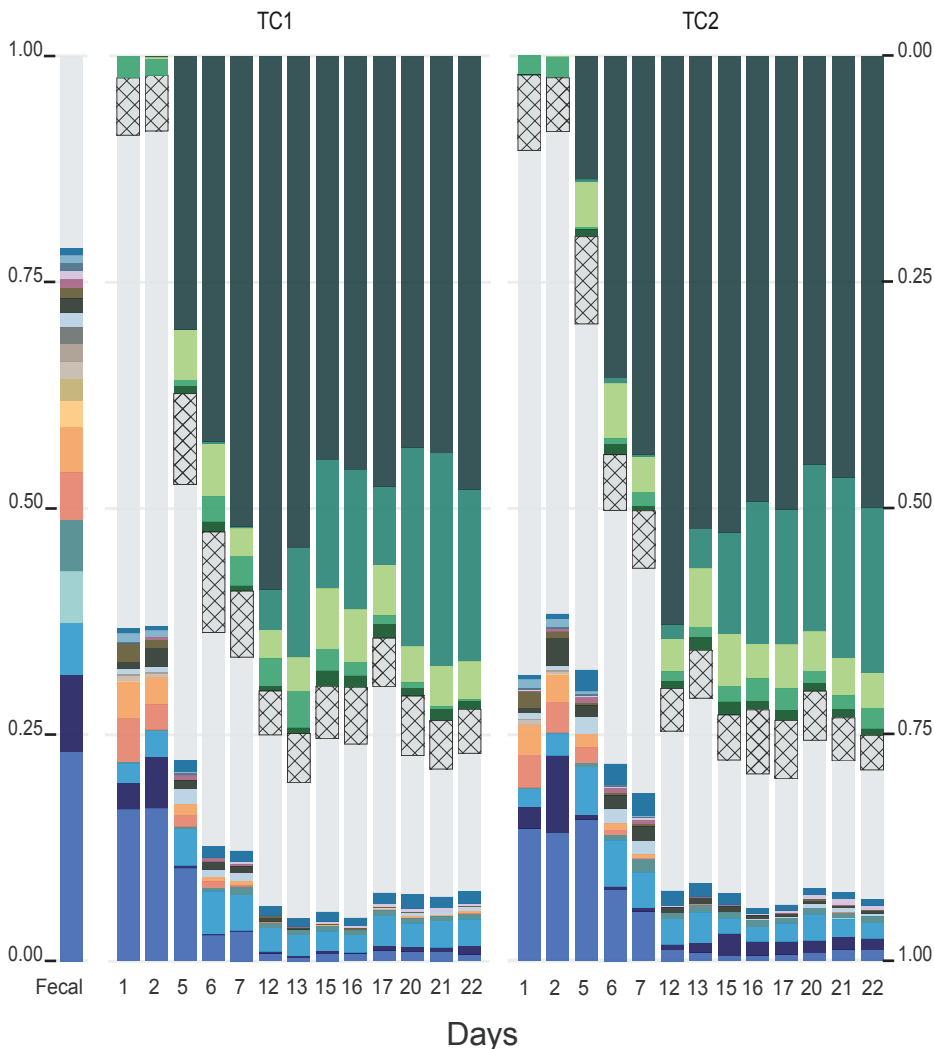

### Fecal ASVs

- *Dialister invisus* [16]
- *Fusicatenibacter saccharivorans* [57]
- *Lachnoclostridium* [109]
- *Bacteroides stercoris* [37]
- *Eubacterium coprostanoligenes* group [76]
- *Blautia massiliensis* [46]
- *Faecalibacterium prausnitzii* [38]
- *Bacteroides uniformis* [21]
- *Lachnospiraceae* NK4A136 group [151]
- *Prevotellaceae* NK3B31 group [130]
- *Faecalibacterium prausnitzii* [91]
- *Lachnospiraceae* NK4A136 group [126]
- *Rhodospirillales* [117]
- *Bacteroides vulgatus* [24]
- *Succiniclasticum* [14]

■ *Blautia* [36]

■ *Lachnospiraceae* NK4A136 group [84]

■ *Sutterella wadsworthensis* [9]

■ *Faecalibacterium prausnitzii* [15]

■ *Bacteroides dorei* [3]

■ Other fecal ASVs

### Top five ASVs bloomers

■ *Bacteroides fragilis* [1]

■ *Akkermansia muciniphila* [4]

■ *Lachnoclostridium* [5]

■ *Veillonella parvula* [10]

■ *Lachnoclostridium* [26]

### Other ASVs

■ Other ASVs
