# Supplementary material for: Ecological Adaptation and Succession of Human Fecal Microbial Communities in an Automated In Vitro Fermentation System
Source: PubMed Central journal article supplement (PMC8409738; doi:10.1128/msystems.00232-21), 2021-07-27

Study    ···· Exp1    — Exp2    Compartment\_Unit    ● Fecal    ● DC1    ● DC2

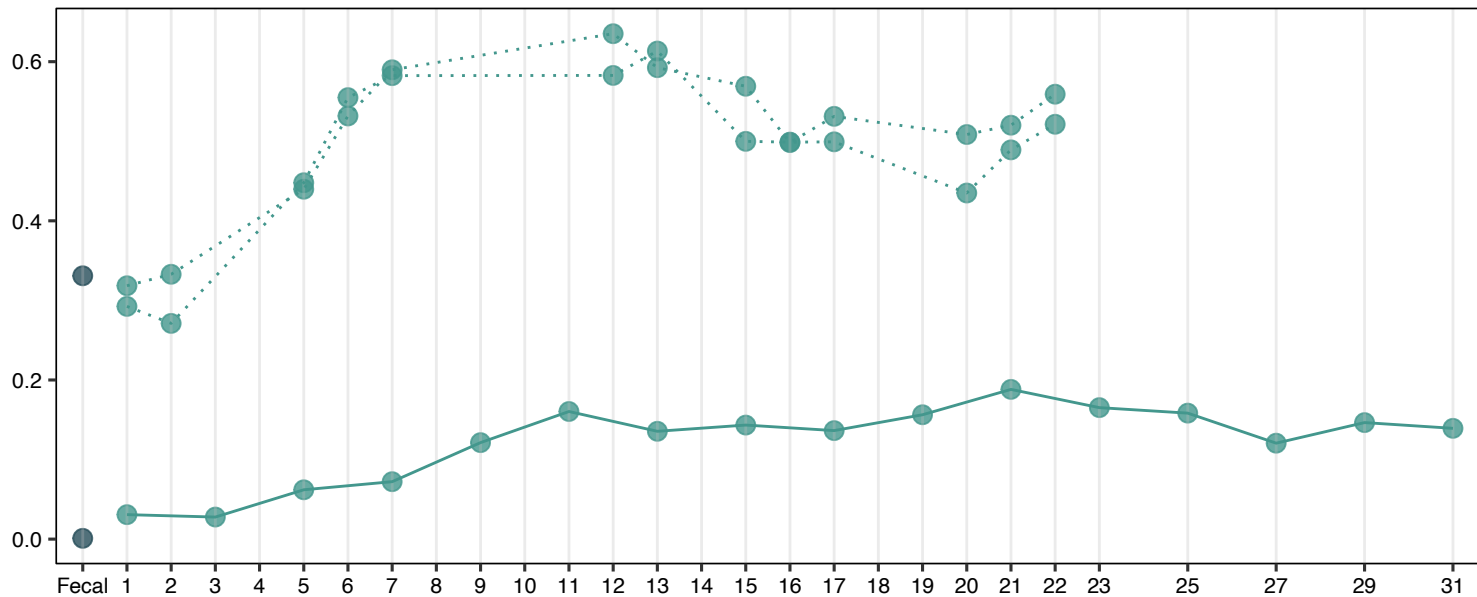

Supplement: msystems.00232-21-sf008.pdf [file msystems.00232-21-sf008.pdf]
